# Supplementary material
Source: HighWire-hosted journal article supplement (doi:10.1101/rna.051292.115)
Supplement: SuppMaterial.docx [file SuppMaterial.docx]

SUPPLEMENTARY INFORMATION

Different effects of ribosomal proteins and Mg2+ ions on the thermodynamic cooperativity of 30S ribosome 5’ domain assembly

Sanjaya C. Abeysirigunawardena and Sarah A. Woodson*

T. C. Jenkins Department of Biophysics, Johns Hopkins University, Baltimore MD 21218 USA

**Supplementary Notes**

The binding of protein S4 binding to the flipped (F) and native (N) conformations of the 5’ domain RNA was fit to the four-state thermodynamic model illustrated below. The equilibrium constants are defined as:

F

F•S

+ S

KF

N

N•S

+ S

KN

K1

K2

(S1)

(S2)

Conservation of mass equations are:

(S3)

(S4)

in which *RT* and *ST* are the total concentrations of RNA and S4 protein, respectively.

Substituting eq. (S1) and (S2) into eq. (S3) and (S4) yields

(S5)

(S6)

Using the expressions for free RNA and protein in eq. (S5) and (S6), the binding equilibrium to the native RNA (eq. S1a) becomes

(S7)

Rearranging eq. S7 results in the quadratic expression

(S8)

Solving the quadratic yields

(S9)

in which  = KN(1+K1).

The observed FRET efficiency, EFRET, is the sum of the FRET efficiencies of the flipped and native complexes, EN and EF, weighted by their concentrations:

(S10)

Substituting the expression for [NS] in eq. (S9) into eq. (S10) yields

(1)

This equation can be fit to the data to obtain *K2* and  = *KN*(1 + *K1*), assuming constant values for *EN* and *EF*. Note that when *ST* >> , EFRET ≈ (*EN* + *EF K2*) / (1 + *K2*). Therefore, the endpoint of each titration depends on the FRET efficiencies of the native and flipped complexes, and the equilibrium constant *K2* between these complexes.

Because *KN* and *K1* do not appear separately in the equation, we cannot solve for them using the fluorescence titration data. Therefore, we obtained *K1* from the fraction of 5’ domain RNA in the native conformation from hydroxyl radical footprinting experiments performed at different Mg2+ concentrations. The fraction of free RNA in the native conformation, ƒ*N,free*, is given by

(S11)

Combining eq. S11 with the fitting parameter  = KN (1 + K1)yields an estimate of *KN*:

(S12)

From the thermodynamic cycle in eq. (S1-S2), we obtain *KF*:

(S13)

The thermodynamic cycle also yields the linkage  between S4 binding and the rRNA conformational equilibrium:

(S14)

When  >1, S4 binding is coupled to a skew toward the flipped conformation compared to the free RNA; when  < 1, S4 binding is coupled to native folding of the rRNA.

Assuming a constant value of  = 0.5 over the course of the Mg2+ titration leads to a simple expression for *KN*,

(S14)

The changes in S4 binding in the presence of other ribosomal proteins cannot be explained by constant .

**Supplementary Table 1: 3’-extensions of the 16S 5’-domain RNA tested in this study.**

| Name | Sequence |
| --- | --- |
| h3E1 | GGCCUUAAGUCGACCAGGCAGCGG |
| h3E2 | GGCCUUAAGUCGCAGCGG |
| h3E3 | ACCGCUGCCGUCGCUCCGG |
| h3E4 | ACCGCUGCCGUCGCUCCGGG |
| **h3E5*** | **AGGACGACACACUUUGGACAGGACACACAGGACACAGG** |
| h3E6 | AGGACGACACACUUUGGACAGGACGGACAGGACACAGG |
| h3E7 | AGGACGACACACUUUGGACAGGACACACAACGACACAGG |
| h3E8 | CAGACACGAAGGACGACACCAGACAGGACGG |
| h3E9 | AGGACGACGAACACAGCACCUUGCACACACG |
| h3E10 | ACCACGACCAGCACCACGACCAGC |

* h3E5 was selected to be used in the study

**Supplementary Table 2: Effects of magnesium ions on protein S4 binding.**

| [Mg2+] (mM) | K2 |  (nM) | K1 | ∆GN˚ 37˚C (kcal/mol) | ∆GF˚ 37˚C (kcal/mol) |
| --- | --- | --- | --- | --- | --- |
| 2.0 | 47 ± 6 | 6.3 ± 0.8 | 10.0 | -13.1 ± 0.1 | -14.1 ± 0.2 |
| 4.0 | 45 ± 8 | 3.7 ± 1.0 | 5.0 | -13.1 ± 0.2 | -14.4 ± 0.2 |
| 6.0 | 3.9 ± 0.1 | 1.0 ± 0.1 | 3.3 | -13.7 ± 0.1 | -13.8 ± 0.2 |
| 8.0 | 0.94 ± 0.03 | 0.14 ± 0.03 | 2.5 | -14.7 ± 0.1 | -14.1 ± 0.2 |
| 10.0 | 0.93 ± 0.02 | 0.26 ± 0.02 | 2.0 | -14.3 ± 0.1 | -13.8 ± 0.1 |
| 12.0 | 0.37 ± 0.01 | 0.15 ± 0.02 | 1.7 | -14.6 ± 0.1 | -13.6 ± 0.1 |
| 16.0 | 0.73 ± 0.03 | 0.15 ± 0.03 | 1.3 | -14.4 ± 0.1 | -14.1 ± 0.2 |
| 20.0 | 0.45 ± 0.02 | 0.16 ± 0.02 | 1.0 | -14.3 ± 0.1 | -13.9 ± 0.1 |

Averaged S4 titration curves (3 trials) at 37 ˚C were fitted to a modified quadratic equation (Eq. 1) to obtain the population distribution between the F and N complexes, K2, and the net equilibrium dissociation constant for the native complex, = (1+K1) KN. K1 was obtained from hydroxyl radical footprinting of the free 5’ domain RNA (nt 501-504) and used to estimate KN. The equilibrium dissociation constant for the flipped complex was calculated using KF = KN K1/K2. Errors for K2 and KN were obtained from the least squares fitting and propagated to obtain errors for ΔGNº and ΔGFº. Uncertainty in K1 is ±10%.

**Supplementary Table 3: Effects of 5’ domain ribosomal proteins S17, S20 and S16.**

| Proteins | K2 |  (nM) | KN (nM) | ∆GN˚ (kcal/mol) | ∆GF˚ (kcal/mol) |
| --- | --- | --- | --- | --- | --- |
| RNA only | 0.45 ± 0.02 | 0.16 ± 0.02 | 0.08 ± 0.01 | -14.3 ± 0.1 | -13.9 ± 0.1 |
| S16 | 0.06 ± 0.01 | 0.16 ± 0.02 | 0.08 ± 0.01 | -14.3 ± 0.1 | -12.6 ± 0.2 |
| S17 | 0.42 ± 0.02 | 0.009 ± 0.009 | 0.003 ± 0.003 | -16.3 ± 0.6 | -15.3 ± 0.6 |
| S20 | 0.75 ± 0.02 | 0.32 ± 0.02 | 0.16 ± 0.02 | -13.9 ± 0.1 | -13.7 ± 0.1 |
| S17-S16 | 0.53 ± 0.02 | 0.28 ± 0.03 | 0.10 ± 0.01 | -14.2 ± 0.1 | -13.4 ± 0.1 |
| S20-S16 | 0.02 ± 0.01 | 0.19 ± 0.01 | 0.09 ± 0.01 | -14.2 ± 0.1 | -11.7 ± 0.4 |
| S20-S17 | 0.14 ± 0.01 | 0.30 ± 0.02 | 0.10 ± 0.01 | -14.2 ± 0.1 | -12.6 ± 0.1 |
| S20-S17-S16 | 0.05 ± 0.03 | 0.63 ± 0.06 | 0.22 ± 0.03 | -13.7 ± 0.1 | -11.4 ± 0.4 |

Data from S4 titrations at 37 ˚C in 20 mM MgCl2 plus other ribosomal proteins (15 nM each) listed. Equilibrium constants and errors were calculated described as in Table S2 and Methods. To estimate K1 for different protein combinations, we used footprinting experiments on the free RNA ƒN = 0.5 (RNA only, S16); RNA + S17 ƒN = 0.34 (S17, S17-S16, S20-S17, S10-S17-S16); and RNA + S10 ƒN = 0.5 (S20, S20-S16), as described in Ramaswamy & Woodson, *J. Mol. Biol*. **392**, 666-677 (2009).
